# Supplementary material for: Multiple and antagonistic effects of water on intrinsic physical properties of model Fischer–Tropsch cobalt catalysts evidenced by in situ X-ray diffraction
Source: Royal Society of Chemistry journal article supplement (doi:10.1039/c4cc00947a), 2014-01-01
Supplement: c4cc00947a1.pdf [file c4cc00947a1.pdf]

## Supporting information

### 1/ TEM experiments

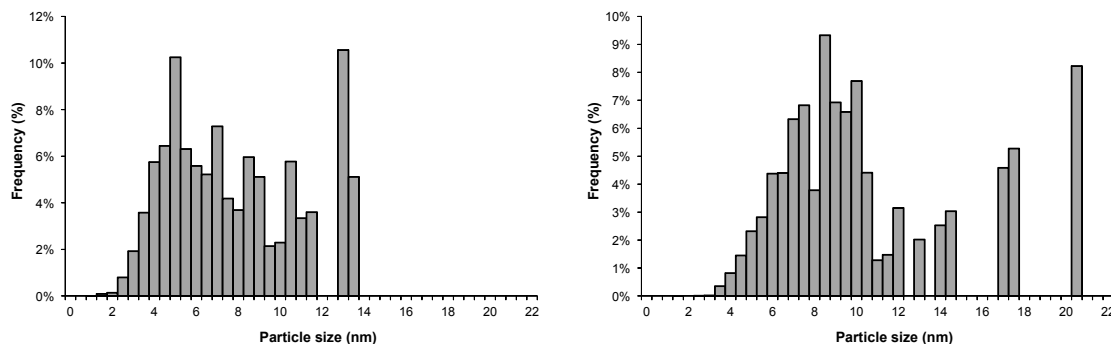

**Figure S1.** Particle size distribution (volume averaged) determined from TEM measurements: 7nm-Co/silica (left) and 12nm-Co/silica (right) catalysts before treatment.

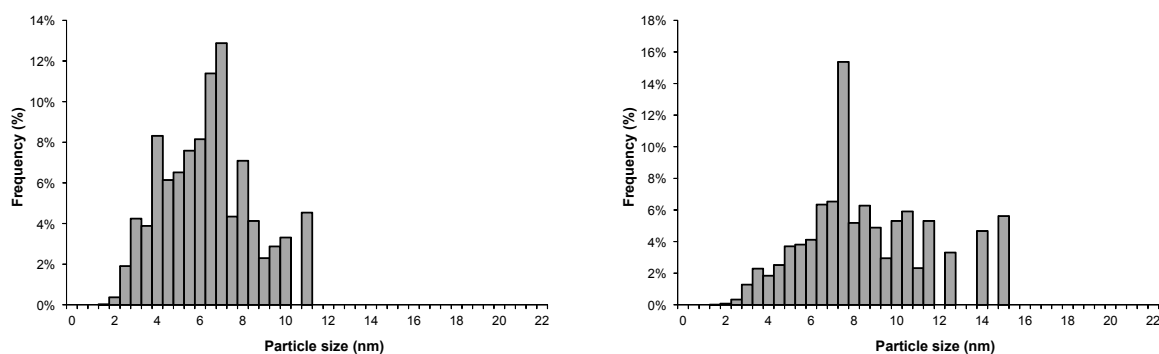

**Figure S2.** Particle size distribution (volume averaged) determined from TEM measurements: 7nm-Co/silica (left) and 12nm-Co/silica (right) catalysts after treatment.

### 2/ Quantification of crystalline phases

Before reduction, the catalyst was fully oxidized in the  $\text{Co}_3\text{O}_4$  form.

During *in situ* reduction of the catalyst, crystalline changes were followed by XRD.

At 100 °C under hydrogen,  $\text{Co}_3\text{O}_4$  was still the unique detected phase and the corresponding diffraction pattern was used as intern reference “ $\text{Co}_3\text{O}_{4\text{initial}}$ ”. The area  $A_{65.2}$  of the diffraction peak at  $65.2^\circ 2\theta$ , typically assigned to  $\text{Co}_3\text{O}_4$ , was used to quantify  $\text{Co}_3\text{O}_4$  when it was not the only crystalline phase anymore (Eq. 1).

$$\% \text{Co}_3\text{O}_4 = 100 \times \frac{A_{65.2}}{A_{\text{Co}_3\text{O}_4 \text{ REF}}} \quad (\text{Eq. 1})$$

Where  $A_{65.2}$  and  $A_{\text{Co}_3\text{O}_4 \text{ REF}}$  are respectively the areas at  $65.2^\circ 2\theta$  on the diffraction patterns of a mixture containing  $\text{Co}_3\text{O}_4$  phase and of the  $\text{Co}_3\text{O}_4$  reference.

Around 250°C under hydrogen, CoO was the unique detected phase and the corresponding diffraction pattern was used as intern reference “CoO<sub>REF</sub>”. The area  $A_{61.6}$  of the diffraction peak at 61.6°2θ was then used to quantify CoO (Eq. 2).

$$\%CoO = 100 \times \frac{A_{61.6}}{A_{CoO REF}} \quad (Eq. 2)$$

Where  $A_{61.6}$  and  $A_{CoO REF}$  are respectively the areas at 61.6°2θ on the diffraction patterns of a mixture containing CoO phase and of the CoO reference.

After reduction at 700 °C and cooling at 230 °C, when Co was the only detected phase (case for 12nm-Co/silica catalyst), the diffraction pattern was used as intern reference “Co REF”. The area  $A_{44.2}$  of the diffraction peak at 44.2°2θ was then used to quantify Co, taking into account the contribution at 44.8°2θ of Co<sub>3</sub>O<sub>4</sub> if this latter was detected by its typical peak at 65.2°2θ (Eq. 3).

$$\%Co = 100 \times \frac{A_{44.2} - A_{65.2} \times \frac{19}{34}}{A_{Co REF}} \quad (Eq. 3)$$

Where  $A_{44.2}$  and  $A_{Co REF}$  are respectively the areas at 44.2°2θ on the diffraction patterns of a mixture containing Co phase and of the Co reference. The coefficient (19/34) was determined on diffraction patterns containing only Co<sub>3</sub>O<sub>4</sub> as the ratio between the areas of the peak at 65.2°2θ and that at 44.8°2θ.

When the catalyst was not fully reduced after the reduction step (case for 7nm-Co/silica catalyst), the proportion  $x\%$  of CoO was determined according to equation 2 and the proportion of Co was then  $(100-x)\%$  before treatment. Equation 3 was then replaced by equation 4.

$$\%Co = 100 \times \frac{A_{44.2} - A_{65.2} \times \frac{19}{34}}{A_{Co REF}} \times \frac{100 - x}{100} \quad (Eq. 4)$$

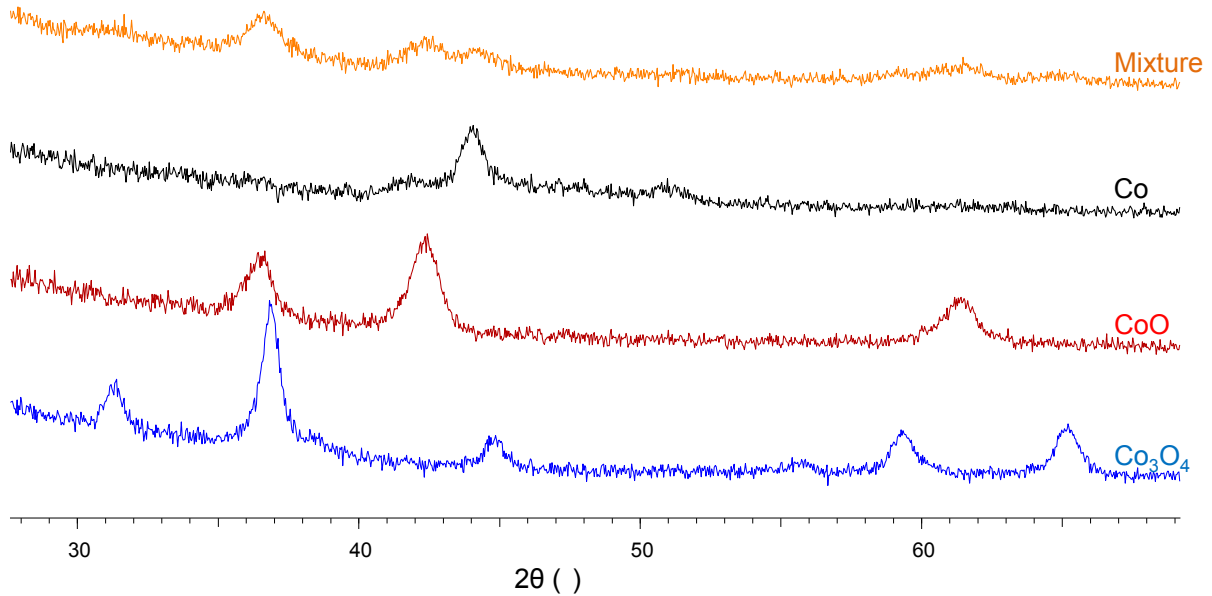

**Figure S3.** XRD patterns of 12nm-Co/silica catalyst during reduction at 100°C (ref Co<sub>3</sub>O<sub>4</sub>, blue), 250°C (ref CoO, red), after reduction at 700°C and cooling at 230°C (ref Co, black), and during steam treatment (mixture of Co, CoO and Co<sub>3</sub>O<sub>4</sub>, orange)
